# Supplementary material
Source: JCI journal article supplement (doi:10.1172/jci174866)
Supplement: sd1 [file 1]

# ORAI1 inhibition as an efficient preclinical therapy for tubular aggregate myopathy and Stormorken syndrome

Roberto Silva-Rojas, Laura Pérez-Guàrdia, Alix Simon, Sarah Djeddi, Susan Treves, Agnès Ribes, Lorenzo Silva-Hernández, Céline Tard, Jocelyn Laporte, Johann Böhm

## SUPPLEMENTAL MATERIAL

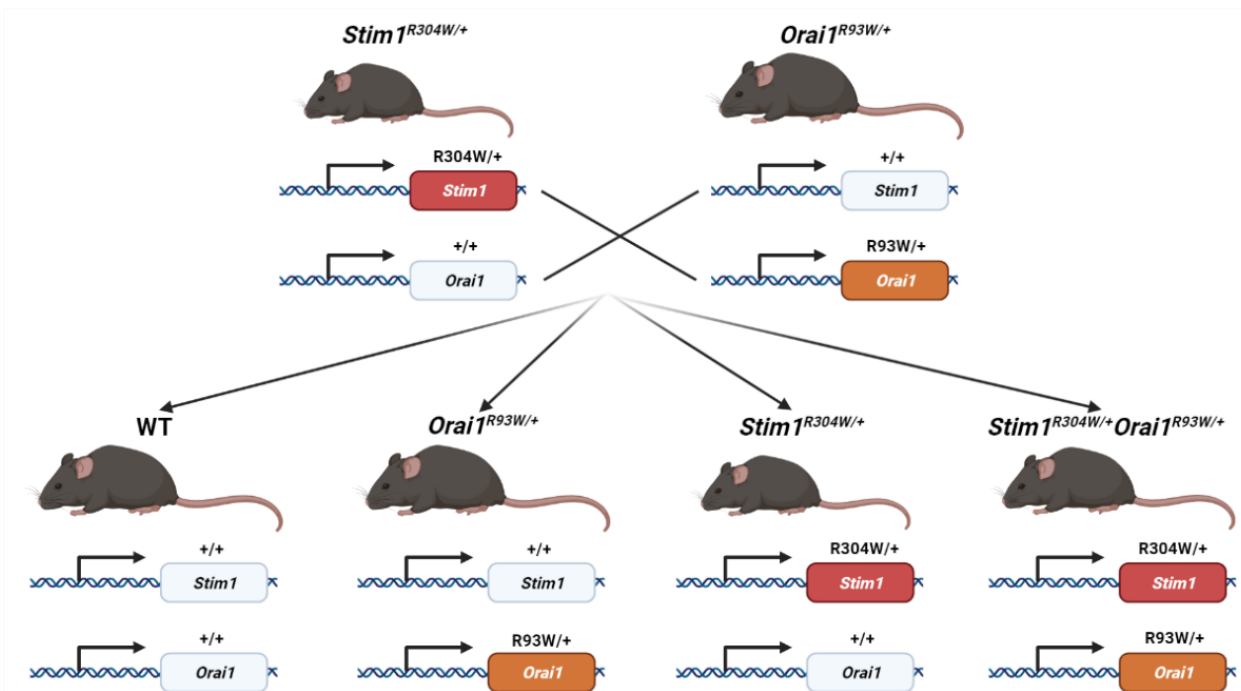

**Figure S1. Crossing scheme.** (A) Crossing of *Stim1*<sup>R304W/+</sup> and *Orai1*<sup>R93W/+</sup> mice resulted in offspring with either of the four equiprobable genotypes: WT, *Orai1*<sup>R93W/+</sup>, *Stim1*<sup>R304W/+</sup>, and *Stim1*<sup>R304W/+</sup>*Orai1*<sup>R93W/+</sup>.

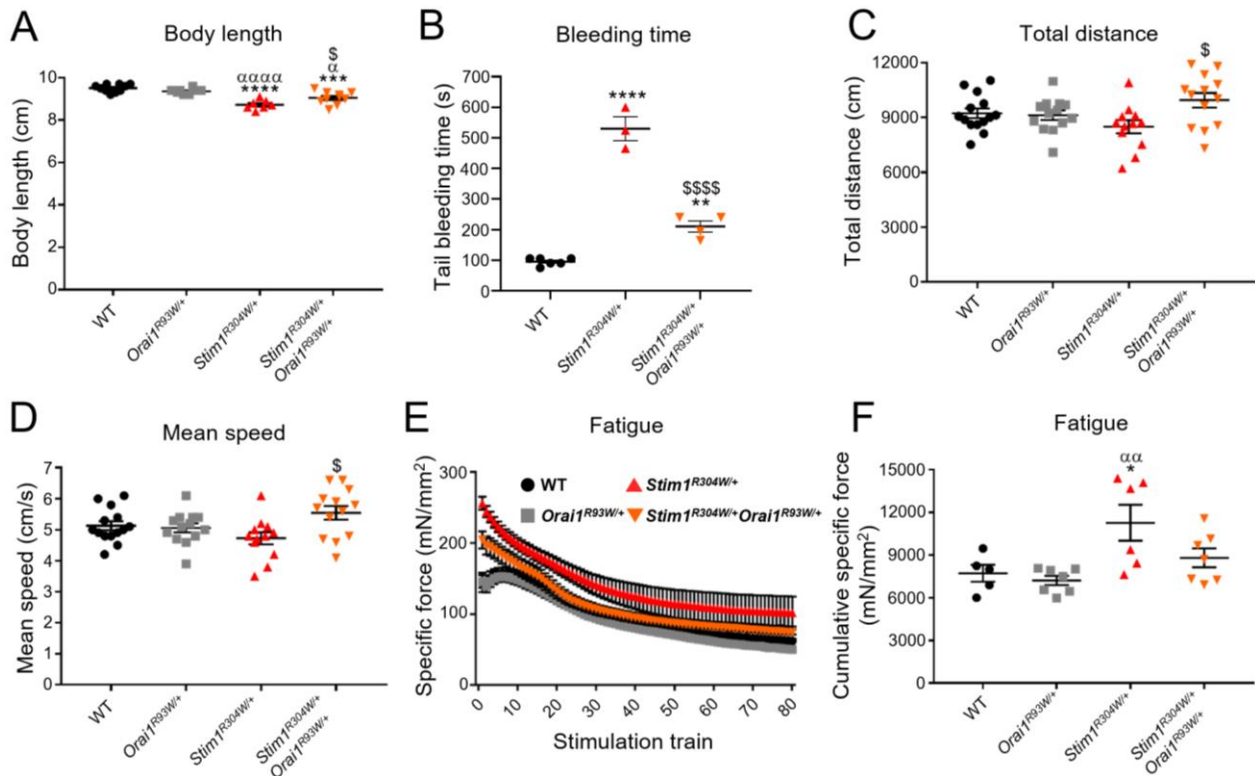

**Figure S2. Improved body length, bleeding times, activity, and fatigue profiles of *Stim1<sup>R304W/+</sup>Orai1<sup>R93W/+</sup>* mice.** (A) At 4 months, *Stim1<sup>R304W/+</sup>* mice were smaller than WT and *Orai1<sup>R93W/+</sup>* littermates, and body length was rescued in *Stim1<sup>R304W/+</sup>Orai1<sup>R93W/+</sup>* mice (n=7-10, one-way ANOVA and Tukey's post hoc test). (B) Tail bleeding assays revealed excessive bleeding times in *Stim1<sup>R304W/+</sup>* mice and significantly improved coagulation in *Stim1<sup>R304W/+</sup>Orai1<sup>R93W/+</sup>* littermates at 4 months (n=3-6, one-way ANOVA and Tukey's post hoc test). (C-D) Open field activity tended to be reduced in *Stim1<sup>R304W/+</sup>* mice as illustrated by the non-significant decrease of covered distance and mean speed at 10 weeks of age. Both parameters were improved in *Stim1<sup>R304W/+</sup>Orai1<sup>R93W/+</sup>* mice (n=11-14, one-way ANOVA and Tukey's post hoc test). (E-F) At 4 months, *Stim1<sup>R304W/+</sup>* mice displayed abnormal fatigue curves associated with higher levels of accumulative force compared with WT and *Orai1<sup>R93W/+</sup>* controls, and both shifted towards normal values in *Stim1<sup>R304W/+</sup>Orai1<sup>R93W/+</sup>* mice (n=5-7, one-way ANOVA and Tukey's post hoc test). Graphs represent mean  $\pm$  SEM. Significant differences are indicated as \*/ $\alpha$ /\$ P<0.05, \*\*/ $\alpha\alpha$ /\$\$ P<0.01, \*\*\*/ $\alpha\alpha\alpha$ /\$\$\$ P<0.001, and

\*\*\*\*/ααα/\$\$\$\$ P<0.0001 with \* reflecting the comparison of *Stim1*<sup>R304W/+</sup> with the WT group, α the comparison with the *Orai1*<sup>R93W/+</sup> group, and \$ the comparison with the *Stim1*<sup>R304W/+</sup> *Orai1*<sup>R93W/+</sup> group.

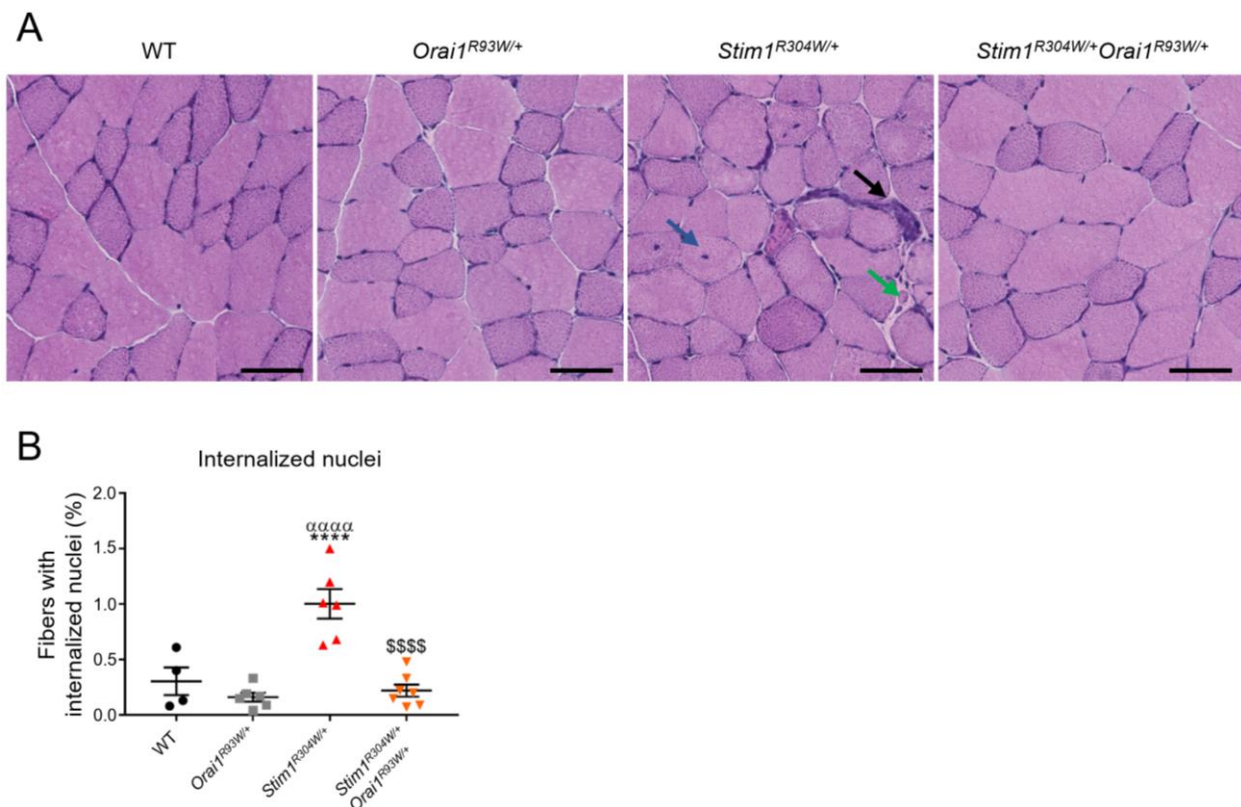

**Figure S3. Resolved myofiber degeneration in *Stim1*<sup>R304W/+</sup>*Orai1*<sup>R93W/+</sup> gastrocnemius.**

(A) Representative H&E pictures of gastrocnemius sections at 4 months showing internalized nuclei (blue arrow), regenerating fibers (green arrow) and infiltration of immune cells (black arrow) in *Stim1*<sup>R304W/+</sup> mice, and a complete absence of the histopathological hallmarks of muscle fiber degeneration in *Stim1*<sup>R304W/+</sup>*Orai1*<sup>R93W/+</sup> sections. Scale bar = 50  $\mu$ m (n=5-7). (B) Fibers with internalized nuclei are increased in *Stim1*<sup>R304W/+</sup> gastrocnemius and normalized in *Stim1*<sup>R304W/+</sup>*Orai1*<sup>R93W/+</sup> muscle (n=4-6, one-way ANOVA and Tukey's post hoc test). The graph represents mean  $\pm$  SEM. Significant differences are indicated as \*\*\*\*/ $\alpha\alpha\alpha\alpha$ /\$\$\$\$ P<0.0001 with \* reflecting the comparison of *Stim1*<sup>R304W/+</sup> with the WT group,  $\alpha$  the comparison with the *Orai1*<sup>R93W/+</sup> group, and \$ the comparison with the *Stim1*<sup>R304W/+</sup>*Orai1*<sup>R93W/+</sup> group.

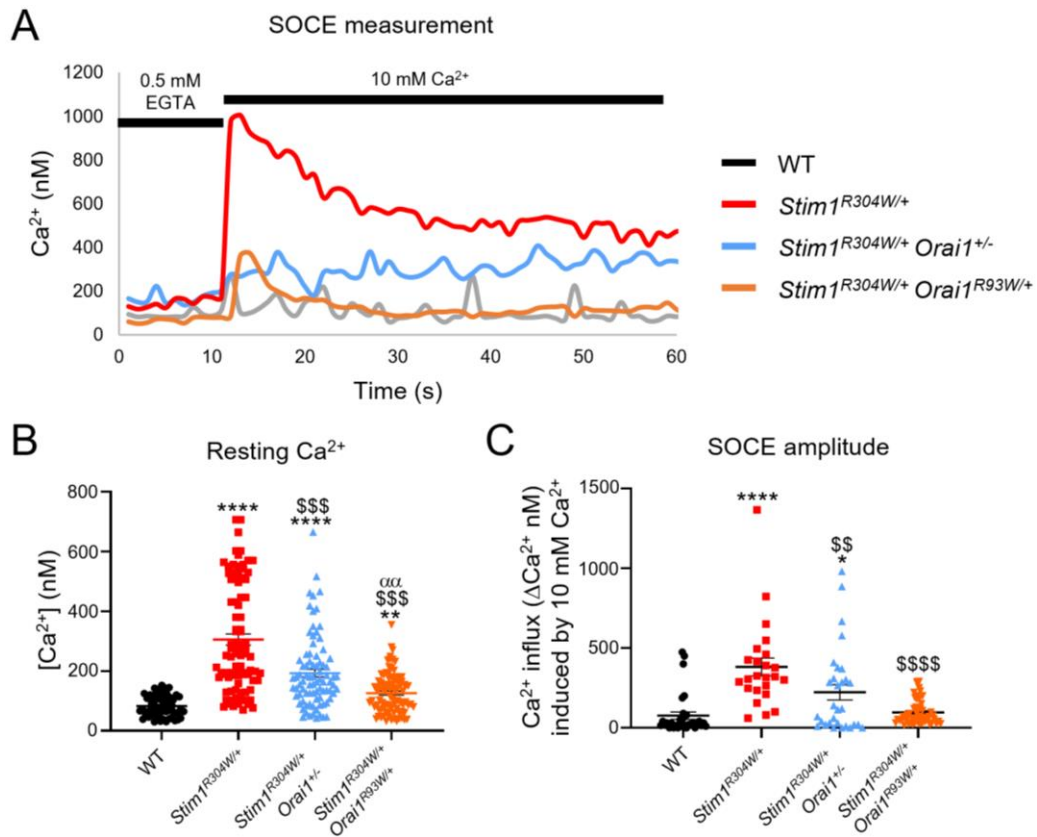

**Figure S4. Comparison of resting Ca<sup>2+</sup> levels and SOCE amplitude in WT, *Stim1*<sup>R304W/+</sup>, *Stim1*<sup>R304W/+</sup>*Orai1*<sup>+/-</sup>, and *Stim1*<sup>R304W/+</sup>*Orai1*<sup>R93W/+</sup> myotubes.** (A) Representative traces showing major extracellular Ca<sup>2+</sup> entry in *Stim1*<sup>R304W/+</sup> myotubes upon addition of 10 mM Ca<sup>2+</sup> to the medium compared with the WT, and significantly less Ca<sup>2+</sup> influx in *Stim1*<sup>R304W/+</sup> *Orai1*<sup>+/-</sup> and *Stim1*<sup>R304W/+</sup> *Orai1*<sup>R93W/+</sup> myotubes (n=24-55 cells). (B-C) Quantification revealed increased resting Ca<sup>2+</sup> levels and SOCE amplitude in *Stim1*<sup>R304W/+</sup> myotubes compared with the WT. Both parameters were moderately improved in *Stim1*<sup>R304W/+</sup> *Orai1*<sup>+/-</sup> myotubes and strongly improved in *Stim1*<sup>R304W/+</sup> *Orai1*<sup>R93W/+</sup> myotubes (resting Ca<sup>2+</sup> n=58-89 and SOCE amplitude n=24-55, Kruskal-Wallis and Dunn's multiple comparison test). Graphs represent mean ± SEM. Significant differences are indicated as \*\*/αα/\$\$ P<0.01, \*\*\*/ααα/\$\$\$ P<0.001, and \*\*\*\*/αααα/\$\$\$\$ P<0.0001 with \* reflecting the comparison with the WT group, α the comparison with the *Stim1*<sup>R304W/+</sup> *Orai1*<sup>+/-</sup> group, and \$ the comparison with the *Stim1*<sup>R304W/+</sup> group.

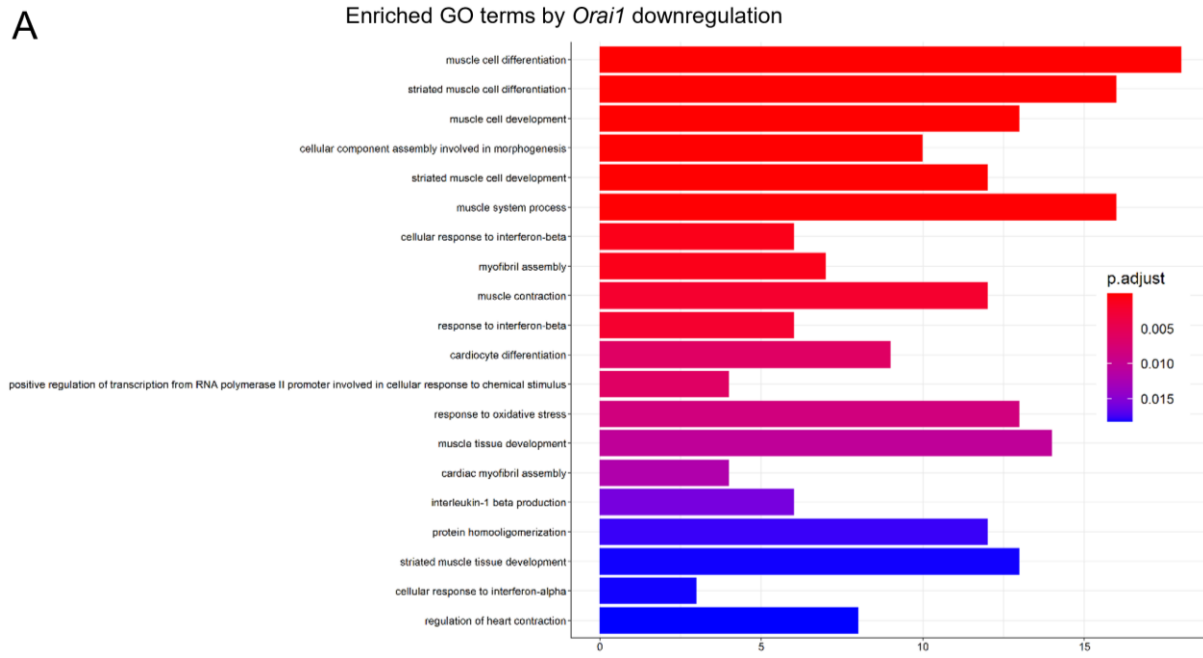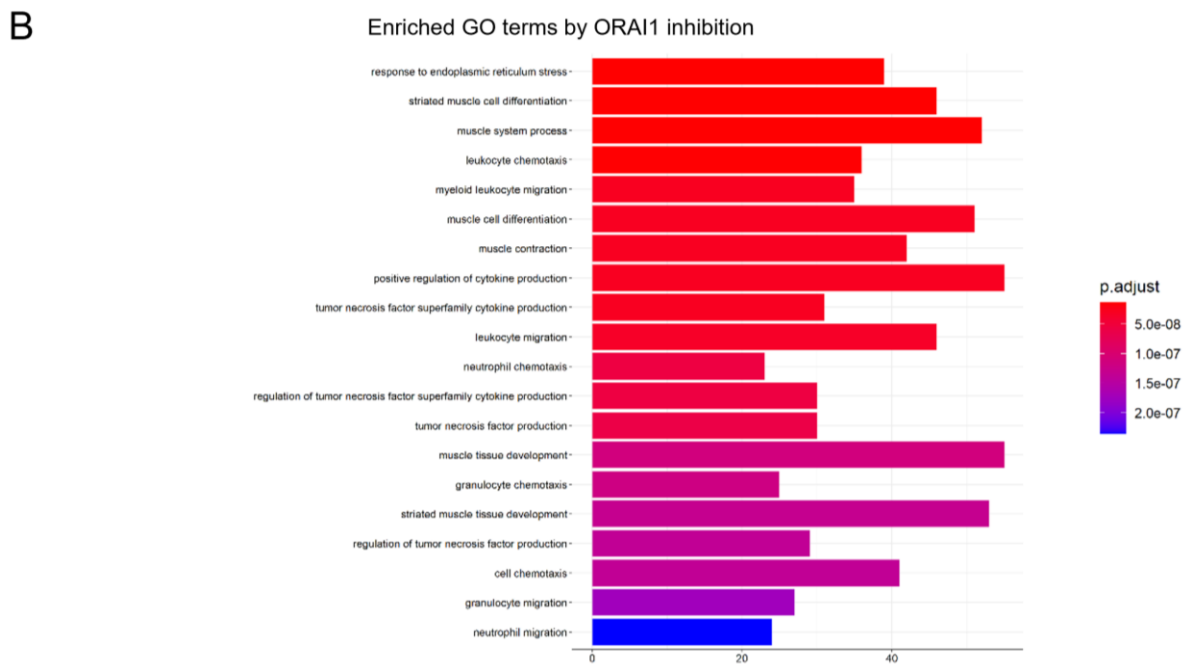

**Figure S5. Comparison of RNA-seq-derived enriched GO terms between ORAI1 inhibition and *Orai1* downregulation.** (A-B) GO term enrichment analysis of genes with partially or completely normalized expression revealed terms associated with muscle contraction and differentiation in both *Stim1*<sup>R304W/+</sup>*Orai1*<sup>+/-</sup> and *Stim1*<sup>R304W/+</sup>*Orai1*<sup>R93W/+</sup> mice. Only *Stim1*<sup>R304W/+</sup>*Orai1*<sup>R93W/+</sup> muscle samples showed an improved expression of genes implicated in immune systems processes and in the response to ER/SR stress (n=4).

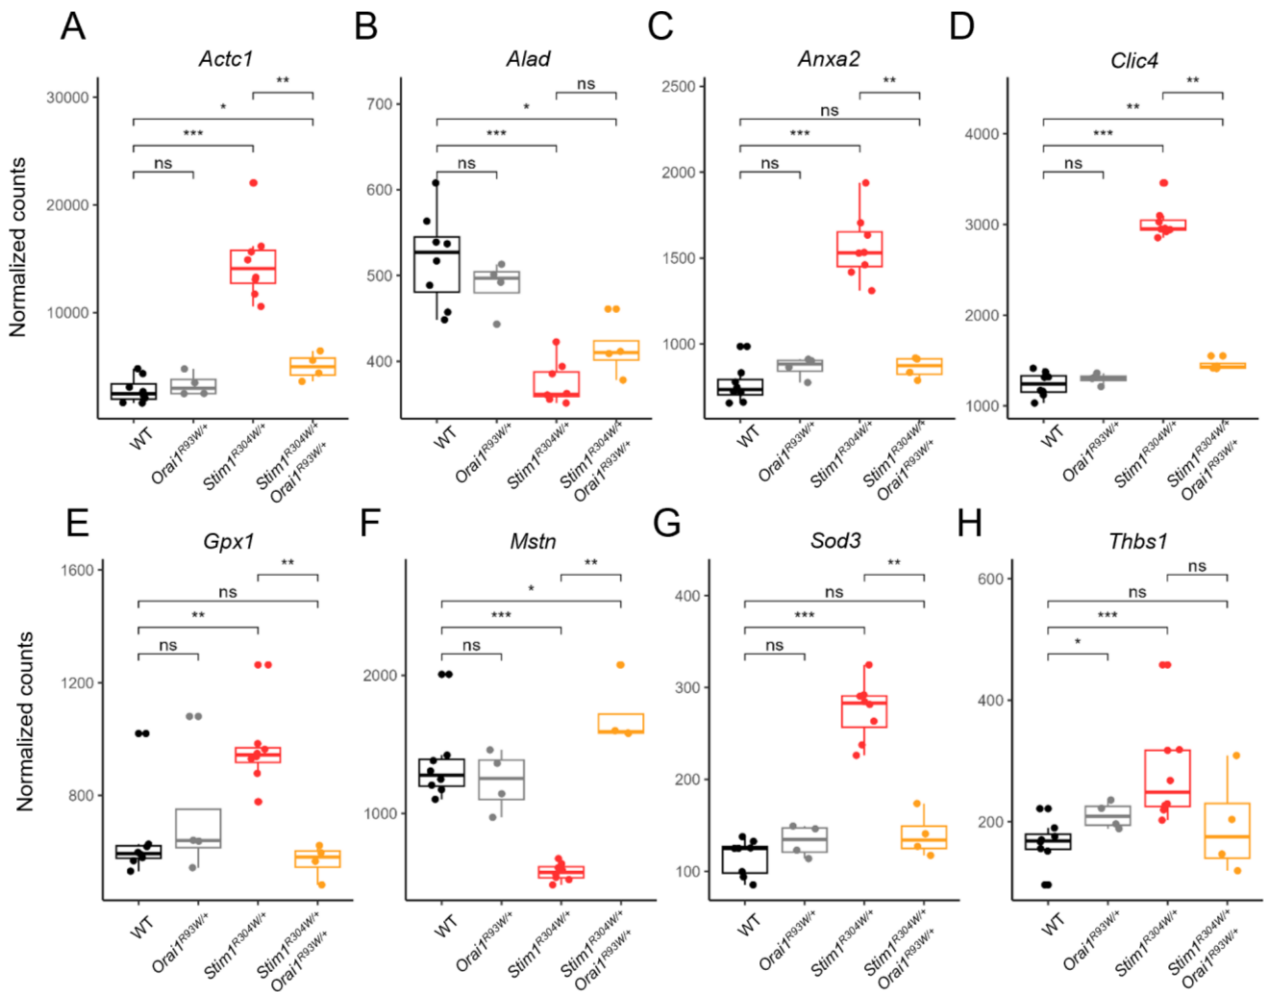

**Figure S6. Selection of *Mstn* as potential biomarker for TAM/STRMK.** (A-H) The known circulating biomarkers *Actc1*, *Alad*, *Anxa2*, *Clic4*, *Gpx1*, *Mstn*, *Sod3*, and *Thbs1* were differentially expressed in *Stim1*<sup>R304W/+</sup> mice compared with the WT, and all were partially or fully normalized in *Stim1*<sup>R304W/+</sup>*Orai1*<sup>R93W/+</sup> muscle (n=3-5, one-way ANOVA and Tukey's post hoc test). Graphs represent mean  $\pm$  SEM. Significant differences are indicated as \*/ $\alpha$ /\$ P<0.05, \*\*/ $\alpha\alpha$ /\$\$ P<0.01, and \*\*\*/ $\alpha\alpha\alpha$ /\$\$\$ P<0.001.

| Gene                  | Forward primer        | Reverse primer         |
|-----------------------|-----------------------|------------------------|
| <i>Rpl27</i>          | AAGCCGTCATCGTGAAGAACA | CTTGATCTTGGATCGCTTGGC  |
| <i>Hspa5</i>          | CTATTCCTGCGTCCGGTGTGT | ATTCCAAGTGCCTCCGATGA   |
| <i>Hspb90b1</i>       | CCACTCAAATCGAACACGGC  | AGATTCCGCCTCCTTTCTGC   |
| <i>Spliced Xbp1</i>   | GCTGAGTCCGCAGCAGGT    | CAGGCTCCAACCTTGCCAGAAT |
| <i>Unspliced Xbp1</i> | CAGACTATGTGCACCTCTGC  | CAGGCTCCAACCTTGCCAGAAT |

### Supplemental Table S1. List of RT-qPCR primers

|                                                                                                                        | BV/TV (%)       | Tb.Th ( $\mu$ m) | Tb.N (1/mm)     | Tb.Sp ( $\mu$ m)   |
|------------------------------------------------------------------------------------------------------------------------|-----------------|------------------|-----------------|--------------------|
| WT                                                                                                                     | 5.48 $\pm$ 1.03 | 66.08 $\pm$ 3.70 | 0.80 $\pm$ 0.13 | 455.13 $\pm$ 29.63 |
| <i>Orai1</i> <sup>R93W/+</sup>                                                                                         | 3.44 $\pm$ 0.44 | 63.39 $\pm$ 2.20 | 0.54 $\pm$ 0.06 | 538.69 $\pm$ 37.32 |
| <i>Stim1</i> <sup>R304W/+</sup>                                                                                        | 0.40 $\pm$ 0.10 | 49.66 $\pm$ 2.25 | 0.08 $\pm$ 0.02 | 770.95 $\pm$ 11.96 |
| <i>Stim1</i> <sup>R304W/+</sup> <i>Orai1</i> <sup>R93W/+</sup>                                                         | 3.55 $\pm$ 0.78 | 66.95 $\pm$ 2.99 | 0.51 $\pm$ 0.10 | 555.80 $\pm$ 43.69 |
| p value<br><i>Stim1</i> <sup>R304W/+</sup> <i>Orai1</i> <sup>R93W/+</sup> vs<br><i>Stim1</i> <sup>R304W/+</sup>        | 0.0257          | 0.0012           | 0.0564          | 0.0393             |
| p value<br>WT control vs<br><i>Stim1</i> <sup>R304W/+</sup> <i>Orai1</i> <sup>R93W/+</sup>                             | >0.999          | 0.9962           | 0.6968          | 0.9156             |
| p value<br><i>Orai1</i> <sup>R93W/+</sup> control vs<br><i>Stim1</i> <sup>R304W/+</sup> <i>Orai1</i> <sup>R93W/+</sup> | >0.999          | 0.8089           | >0.999          | >0.999             |

### Supplemental Table S2. Trabecular bone parameters of the femur

BV/TV, bone volume fraction; Tb.Th, trabecular thickness; Tb.N, trabecular number; Tb.Sp, trabecular separation. P values refer to the comparison of *Stim1*<sup>R304W/+</sup> and *Stim1*<sup>R304W/+</sup> *Orai1*<sup>+/-</sup> by Tukey's post hoc test one-way ANOVA of all groups (n=6-7).
